# Supplementary material for: Can education be personalised using pupils’ genetic data?
Source: eLife. 2020 Mar 10;9:e49962. doi: 10.7554/eLife.49962 (PMC7064332; doi:10.7554/eLife.49962)
Supplement: Supplementary file 1. — (A) Variance explained in educational achievement at age 7. Polygenic scores (PGS) built using only genome-wide significant SNPs (GWAS sig PGS) or all education associated SNPs (All SNP PGS) from the largest GWAS of educational attainment (Lee et al., 2018). FSM, Free School Meals. EFL, English as a Foreign Language. SEN, Special Educational Needs. Eduyears, years of education. SEP, socioeconomic position. (B) Incremental R2 for educational achievement at age 7. Polygenic scores (PGS) built using only genome-wide significant SNPs (GWAS sig PGS) or all education associated SNPs (All SNP PGS) from the largest GWAS of educational attainment (Lee et al., 2018). FSM, Free School Meals. EFL, English as a Foreign Language. SEN, Special Educational Needs. Eduyears, years of education. SEP, socioeconomic position. (C) Variance explained in educational achievement at age 16. Polygenic scores (PGS) built using only genome-wide significant SNPs (GWAS sig PGS) or all education associated SNPs (All SNP PGS) from the largest GWAS of educational attainment (Lee et al., 2018). FSM, Free School Meals. EFL, English as a Foreign Language. SEN, Special Educational Needs. EA7, prior educational achievement at age 7. EA11, prior educational achievement at age 11. EA14, prior educational achievement at age 14. Eduyears, years of education. SEP, socioeconomic position. (D) Incremental R2 for educational achievement at age 16. Polygenic scores (PGS) built using only genome-wide significant SNPs (GWAS sig PGS) or all education associated SNPs (All SNP PGS) from the largest GWAS of educational attainment (Lee et al., 2018). FSM, Free School Meals. EFL, English as a Foreign Language. SEN, Special Educational Needs. EA7, prior educational achievement at age 7. EA11, prior educational achievement at age 11. EA14, prior educational achievement at age 14. (E) Agreement between educational achievement (EA) quantiles and other quantiled measures. Polygenic scores (PGS) built using only genome-wide si [file elife-49962-supp1.xlsx]

## Sheet: Supplementary file 1A
Polygenic score (PGS)	Covariates	R2	Lower 95% CI from bootstraps	Upper 95% CI from bootstraps
No PGS	Age, sex	0.060482	0.043601	0.077363
GWAS sig PGS	Age, sex	0.083937	0.066095	0.101779
All SNP PGS	Age, sex	0.123893	0.102153	0.145633
No PGS	Age, sex, FSM, EFL, SEN	0.167781	0.142809	0.192753
GWAS sig PGS	Age, sex, FSM, EFL, SEN	0.185696	0.160279	0.211113
All SNP PGS	Age, sex, FSM, EFL, SEN	0.215013	0.189151	0.240875
No PGS	Age, sex, FSM, EFL, SEN, parents Eduyears	0.238826	0.213266	0.264386
GWAS sig PGS	Age, sex, FSM, EFL, SEN, parents Eduyears	0.247198	0.221092	0.273303
All SNP PGS	Age, sex, FSM, EFL, SEN, parents Eduyears	0.257594	0.230686	0.284502
No PGS	Age, sex, FSM, EFL, SEN, parents Eduyears, parents SEP	0.244971	0.216829	0.273113
GWAS sig PGS	Age, sex, FSM, EFL, SEN, parents Eduyears, parents SEP	0.252427	0.22521	0.279644
All SNP PGS	Age, sex, FSM, EFL, SEN, parents Eduyears, parents SEP	0.262971	0.234203	0.291738
Variance explained in educational achievement at age 7. Polygenic scores (PGS) built using only genome-wide significant SNPs (GWAS sig SNPs) or all education associated SNPs (All SNP PGS) from the largest GWAS of educational attainment (Lee et al, 2018). FSM, Free School Meals. EFL, English as a Foreign Language. SEN, Special Educational Needs. Eduyears, years of education. SEP, socioeconomic pos…

## Sheet: Supplementary file 1B
Polygenic score (PGS)	Covariates	Incremental gain in R2	Lower 95% CI from bootstraps	Upper 95% CI from bootstraps
GWAS sig PGS	Age, sex	0.023455	0.005614	0.041297
All SNP PGS	Age, sex	0.063411	0.041671	0.085151
GWAS sig PGS	Age, sex, FSM, EFL, SEN	0.017915	-0.0075	0.043332
All SNP PGS	Age, sex, FSM, EFL, SEN	0.047232	0.02137	0.073094
GWAS sig PGS	Age, sex, FSM, EFL, SEN, parents Eduyears	0.008372	-0.01773	0.034477
All SNP PGS	Age, sex, FSM, EFL, SEN, parents Eduyears	0.018768	-0.00814	0.045676
GWAS sig PGS	Age, sex, FSM, EFL, SEN, parents Eduyears, parents SEP	0.007456	-0.01976	0.034673
All SNP PGS	Age, sex, FSM, EFL, SEN, parents Eduyears, parents SEP	0.018	-0.01077	0.046767
Incremental R2 for educational achievement at age 7. Polygenic scores (PGS) built using only genome-wide significant SNPs (GWAS sig SNPs) or all education associated SNPs (All SNP PGS) from the largest GWAS of educational attainment (Lee et al, 2018). FSM, Free School Meals. EFL, English as a Foreign Language. SEN, Special Educational Needs. Eduyears, years of education. SEP, socioeconomic positi…

## Sheet: Supplementary file 1C
Polygenic score (PGS)	Covariates	R2	Lower 95% CI from bootstraps	Upper 95% CI from bootstraps
No PGS	Age, sex,	0.032907	0.019845	0.04597
GWAS sig PGS	Age, sex,	0.066455	0.049561	0.083349
All SNP PGS	Age, sex,	0.16226	0.138444	0.186076
No PGS	Age, sex, FSM, EFL, SEN	0.159373	0.133462	0.185284
GWAS sig PGS	Age, sex, FSM, EFL, SEN	0.18515	0.15853	0.21177
All SNP PGS	Age, sex, FSM, EFL, SEN	0.262899	0.235065	0.290733
No PGS	Age, sex, FSM, EFL, SEN, EA7	0.465058	0.439548	0.490569
GWAS sig PGS	Age, sex, FSM, EFL, SEN, EA7	0.471385	0.446809	0.495962
All SNP PGS	Age, sex, FSM, EFL, SEN, EA7	0.503215	0.479072	0.527359
No PGS	Age, sex, FSM, EFL, SEN, EA11	0.501463	0.454133	0.548793
GWAS sig PGS	Age, sex, FSM, EFL, SEN, EA11	0.508429	0.464163	0.552694
All SNP PGS	Age, sex, FSM, EFL, SEN, EA11	0.534566	0.493807	0.575325
No PGS	Age, sex, FSM, EFL, SEN, EA14	0.651496	0.608533	0.694458
GWAS sig PGS	Age, sex, FSM, EFL, SEN, EA14	0.653617	0.611231	0.696003
All SNP PGS	Age, sex, FSM, EFL, SEN, EA14	0.663347	0.622094	0.704601
No PGS	Age, sex, FSM, EFL, SEN, EA7, EA11, EA14	0.676328	0.64597	0.706686
GWAS sig PGS	Age, sex, FSM, EFL, SEN, EA7, EA11, EA14	0.677808	0.647664	0.707951
All SNP PGS	Age, sex, FSM, EFL, SEN, EA7, EA11, EA14	0.686275	0.656997	0.715552
Variance explained in educational achievement at age 16. Polygenic scores (PGS) built using only genome-wide significant SNPs (GWAS sig SNPs) or all education associated SNPs (All SNP PGS) from the largest GWAS of educational attainment (Lee et al, 2018). FSM, Free School Meals. EFL, English as a Foreign Language. SEN, Special Educational Needs. EA7, prior educational achievement at age 7. EA11, …

## Sheet: Supplementary file 1D
Polygenic score (PGS)	Covariates	Incremental gain in R2	Lower 95% CI from bootstraps	Upper 95% CI from bootstraps
Parents Eduyears	Age, sex,	0.190153	0.165965	0.214341
Parents SEP	Age, sex,	0.213652	0.18835	0.238954
GWAS sig PGS	Age, sex,	0.033548	0.016653	0.050442
All SNP PGS	Age, sex,	0.129353	0.105536	0.153169
GWAS sig PGS	Age, sex, FSM, EFL, SEN	0.025778	-0.00084	0.052398
All SNP PGS	Age, sex, FSM, EFL, SEN	0.103526	0.075692	0.13136
GWAS sig PGS	Age, sex, FSM, EFL, SEN, EA7	0.006327	-0.01825	0.030903
All SNP PGS	Age, sex, FSM, EFL, SEN, EA7	0.038157	0.014014	0.062301
GWAS sig PGS	Age, sex, FSM, EFL, SEN, EA11	0.006966	-0.0373	0.051232
All SNP PGS	Age, sex, FSM, EFL, SEN, EA11	0.033104	-0.00766	0.073862
GWAS sig PGS	Age, sex, FSM, EFL, SEN, EA14	0.002122	-0.04026	0.044508
All SNP PGS	Age, sex, FSM, EFL, SEN, EA14	0.011852	-0.0294	0.053105
GWAS sig PGS	Age, sex, FSM, EFL, SEN, EA7, EA11, EA14	0.00148	-0.02866	0.031623
All SNP PGS	Age, sex, FSM, EFL, SEN, EA7, EA11, EA14	0.009947	-0.01933	0.039224
Incremental R2 for educational achievement at age 16. Polygenic scores (PGS) built using only genome-wide significant SNPs (GWAS sig SNPs) or all education associated SNPs (All SNP PGS) from the largest GWAS of educational attainment (Lee et al, 2018). FSM, Free School Meals. EFL, English as a Foreign Language. SEN, Special Educational Needs. EA7, prior educational achievement at age 7. EA11, pri…

## Sheet: Supplementary file 1E
	Age 7 achievement		Age 16 achievement
	Agreement	Kappa	Agreement	Kappa
Quintiles
Genotypic predictor
GWAS sig PGS	0.241	0.05 (0.01)	0.232	0.04 (0.01)
All SNPs PGS	0.263	0.08 (0.01)	0.282	0.10 (0.01)
Phenotypic predictor
Age 14 EA			0.565	0.46 (0.01)
Age 11 EA			0.468	0.33 (0.01)
Age 7 EA			0.378	0.22 (0.01)
Deciles
Genotypic predictor
GWAS sig PGS	0.114	0.02 (0.01)	0.124	0.03 (0.01)
All SNPs PGS	0.139	0.04 (0.01)	0.143	0.05 (0.01)
Phenotypic predictor
Age 14 EA			0.351	0.28 (0.01)
Age 11 EA			0.275	0.19 (0.01)
Age 7 EA			0.209	0.12 (0.01)
Agreement between educational achievement (EA) quantiles and other quantiled measures. Polygenic scores (PGS) built using only genome-wide significant SNPs (GWAS sig SNPs) or all education associated SNPs (All SNP PGS) from the largest GWAS of educational attainment (Lee et al, 2018). p values for all tests <0.001.
